# Supplementary material for: Dy3+-doped LaInO3: a host-sensitized white luminescence phosphor with exciton-mediated energy transfer
Source: Royal Society of Chemistry journal article supplement (doi:10.1039/d1tc01317c), 2021-01-01
Supplement: d1tc01317c1.pdf [file d1tc01317c1.pdf]

## Supplementary Information

### **Dy<sup>3+</sup> doped LaInO<sub>3</sub>: A host-sensitized white luminescence phosphor with exciton-mediated energy transfer**

Tao Hu<sup>a</sup>, Lei Xia<sup>a</sup>, Wen Liu<sup>a</sup>, Jiyang Xie<sup>a</sup>, Zuimin Jiang<sup>b</sup>, Fei Xiong<sup>\*a, b</sup>, and

Wanbiao Hu<sup>\*a</sup>

<sup>a</sup> Key Laboratory of LCR Materials and Devices of Yunnan Province, National Center for International Research on Photoelectric and Energy Materials, School of Materials and Energy, Yunnan University, Kunming 650091, PR China

<sup>b</sup> State Key Laboratory of Surface Physics and Department of Physics, Fudan University, Shanghai 200433, P. R. China

**Table S1 Structural parameters of LIO:  $x\text{Dy}^{3+}$** 

| Doping level ( $x$ )  | 0.00    | 0.01    | 0.02    | 0.03    | 0.05    | 0.07    | 0.09    |
|-----------------------|---------|---------|---------|---------|---------|---------|---------|
| $a$ (Å)               | 5.9369  | 5.9352  | 5.9353  | 5.9342  | 5.9323  | 5.9315  | 5.9296  |
| $b$ (Å)               | 8.2175  | 8.2167  | 8.2161  | 8.2144  | 8.2118  | 8.2101  | 8.2069  |
| $c$ (Å)               | 5.7240  | 5.7227  | 5.7216  | 5.7191  | 5.7154  | 5.7122  | 5.7077  |
| $V$ (Å <sup>3</sup> ) | 279.253 | 279.083 | 279.014 | 278.783 | 278.425 | 278.174 | 277.757 |
| $\alpha$ (°)          | 90      | 90      | 90      | 90      | 90      | 90      | 90      |
| $\beta$ (°)           | 90      | 90      | 90      | 90      | 90      | 90      | 90      |
| $\gamma$ (°)          | 90      | 90      | 90      | 90      | 90      | 90      | 90      |
| $R_p$ (%)             | 5.10    | 5.16    | 4.75    | 4.94    | 5.45    | 4.56    | 4.37    |
| $R_{wp}$ (%)          | 6.69    | 6.86    | 6.34    | 6.49    | 6.80    | 5.96    | 5.74    |
| $\chi^2$              | 4.87    | 4.65    | 4.12    | 4.60    | 4.69    | 3.74    | 3.25    |

The Structural parameters of LIO:  $x\text{Dy}^{3+}$  are obtained by refining the measured XRD patterns. The parameters i.e.  $R_p$  and  $R_{wp}$  finally converge to less than 10%, and  $\chi^2$  is also less than 10, indicating the refined results are reliable. The lattice constants  $a$ ,  $b$ ,  $c$  decrease with the increasing of  $\text{Dy}^{3+}$  doping levels, revealing that the host lattice shrinkage after introducing  $\text{Dy}^{3+}$  ions.

Table S2 Bond angle and bond length of LIO:  $x\text{Dy}^{3+}$

| Doping level (x) | Bond angle ( ° )                     |                                         | Bond length ( Å )                |                                  |                                  |                   |                   |
|------------------|--------------------------------------|-----------------------------------------|----------------------------------|----------------------------------|----------------------------------|-------------------|-------------------|
|                  | In-O <sub>1</sub> -In (along b axis) | In-O <sub>2</sub> -In (along a, c axis) | In-O <sub>1</sub> (along b axis) | In-O <sub>2</sub> (along c axis) | In-O <sub>2</sub> (along a axis) | La-O <sub>1</sub> | La-O <sub>2</sub> |
| 0.00             | 143.348                              | 144.748                                 | 2.164                            | 2.216                            | 2.111                            | 2.583             | 2.668             |
| 0.01             | 143.355                              | 144.745                                 | 2.164                            | 2.215                            | 2.110                            | 2.581             | 2.667             |
| 0.02             | 143.359                              | 144.745                                 | 2.164                            | 2.215                            | 2.110                            | 2.581             | 2.667             |
| 0.03             | 143.366                              | 144.743                                 | 2.163                            | 2.214                            | 2.109                            | 2.581             | 2.666             |
| 0.05             | 143.377                              | 144.740                                 | 2.162                            | 2.213                            | 2.109                            | 2.580             | 2.665             |
| 0.07             | 143.388                              | 144.738                                 | 2.162                            | 2.212                            | 2.108                            | 2.579             | 2.664             |
| 0.09             | 143.400                              | 144.735                                 | 2.161                            | 2.211                            | 2.107                            | 2.578             | 2.663             |

Both In-O bond length and La-O bond length are shortened with the incorporation of  $\text{Dy}^{3+}$  into LIO host. Meanwhile, the In-O<sub>1</sub>-In bond angle increases from 143.348 to 143.400 ° with increasing the  $\text{Dy}^{3+}$  doping levels, and the In-O<sub>2</sub>-In bond angle decreases from 144.748 to 144.735 °. However, the increase is far greater than the decrease, which results in the reduced lattice distortion in the higher doped phosphors.

**Table S3 CIE chromaticity coordinates (x, y) and color correlated temperature (CCT) for the emission of LIO: xDy<sup>3+</sup> under 328 nm excitation at room temperature**

| Doping level (x) | x      | y      | CCT (K) |
|------------------|--------|--------|---------|
| 0.00             | 0.1963 | 0.1079 | 2180    |
| 0.01             | 0.2781 | 0.2359 | -       |
| 0.02             | 0.3324 | 0.3239 | 5494    |
| 0.03             | 0.3474 | 0.3422 | 4873    |
| 0.05             | 0.4332 | 0.4681 | 3497    |
| 0.07             | 0.4320 | 0.4674 | 3512    |
| 0.09             | 0.4317 | 0.4666 | 3512    |

Color correlated temperature (CCT) is given by the McCamy empirical formula,<sup>1, 2</sup>  $CCT = -437n^3 + 3601n^2 - 6361n + 5514.34$ , where  $n = (x - x_e)/(y - y_e)$  is the inverse slope line and chromaticity epicenter is at  $x_e = 0.3320$  and  $y_e = 0.1858$ . The CIE chromaticity coordinates of LIO: 0.02Dy<sup>3+</sup> and LIO: 0.03Dy<sup>3+</sup> are (0.3324, 0.3239) and (0.3474, 0.3422), respectively, which are nearing the natural white light (0.3333, 0.3333). The luminescence CCT of LIO: 0.03Dy<sup>3+</sup> is 4873 K. The results indicate that the warm-white-light has been achieved in single phosphor of Dy-LIO.

**Table S4 CIE chromaticity coordinates (x, y) and color correlated temperature (CCT) of the luminescence from LIO: 0.03Dy<sup>3+</sup> under 328 nm excitation at different temperature**

| <b>Temperature (K)</b> | <b>x</b> | <b>y</b> | <b>CCT (K)</b> |
|------------------------|----------|----------|----------------|
| 298                    | 0.3474   | 0.3422   | 4873           |
| 328                    | 0.3475   | 0.3436   | 4875           |
| 358                    | 0.3472   | 0.3450   | 4892           |
| 388                    | 0.3472   | 0.3462   | 4896           |
| 418                    | 0.3479   | 0.3484   | 4877           |
| 448                    | 0.3482   | 0.3500   | 4872           |
| 478                    | 0.3480   | 0.3507   | 4882           |

**Table S5 Phosphors with high reported efficiency of host-sensitized energy transfer**

| Sample                               | Energy transfer | Maximum $\eta_{\tau}$ | Maximum $\eta_l$ | References       |
|--------------------------------------|-----------------|-----------------------|------------------|------------------|
| LuNbO <sub>4</sub> :Dy               | Host→Dy         | 68.79%                | 90.3%            | 3                |
| LaNbO <sub>4</sub> :Eu               | Host→Eu         | 88.23%                | 98.23%           |                  |
| LaNbO <sub>4</sub> :Tb               | Host→Tb         | 88.82%                | 97.92%           | 4                |
| LaNbO <sub>4</sub> :Dy               | Host→Dy         | 80.88%                | 91.44%           |                  |
| CaNb <sub>2</sub> O <sub>6</sub> :Eu | Host→Eu         | 39.23%                | 98%              |                  |
| CaNb <sub>2</sub> O <sub>6</sub> :Tb | Host→Tb         | 34.93%                | 80%              | 5                |
| CaNb <sub>2</sub> O <sub>6</sub> :Dy | Host→Dy         | 22.95%                | 67%              |                  |
| CaNb <sub>2</sub> O <sub>6</sub> :Sm | Host→Sm         | 24.83%                | 72%              |                  |
| CaWO <sub>4</sub> :Eu                | Host→Eu         | 61.23%                | 90%              | 6                |
| CaWO <sub>4</sub> :Tb                | Host→Eu         | 66.67%                | 95%              |                  |
| LIO:Dy                               | Host→Dy         | 51.3%                 | 77.2%            | <b>This work</b> |

These typical phosphors are selected to be listed in this table, because the previous references have reported that the efficiency of host-sensitized energy transfer of these materials is very high. Previous reports also showed that the energy transfer efficiency  $\eta_{\tau}$  is less than  $\eta_l$ . Similar phenomenon is also observed in this work, where the  $\eta_{\tau}$  and  $\eta_l$  are 51.3% and 77.2%, respectively.

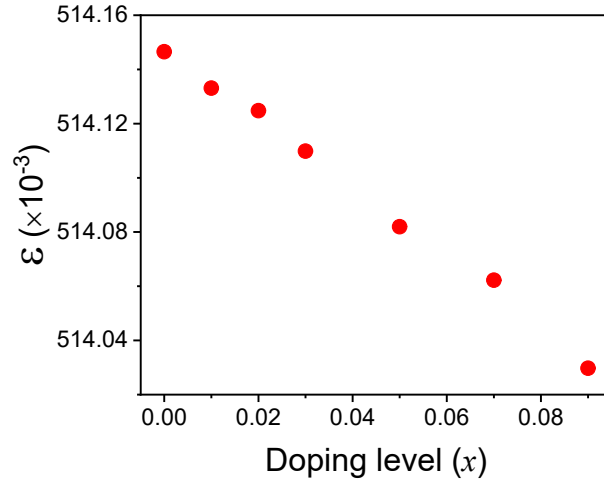

**Fig. S1 Variation of metric distortion parameter ( $\epsilon$ ) with  $Dy^{3+}$  doping levels in LIO:  $x Dy^{3+}$  phosphors.**

The metric distortion ( $\epsilon$ ) is described as follows:<sup>7</sup>

$$\epsilon = \frac{1}{3} \left[ \left\{ \frac{a_{norm} - a_{ps.cubic}}{a_{ps.cubic}} \right\}^2 + \left\{ \frac{b_{norm} - a_{ps.cubic}}{a_{ps.cubic}} \right\}^2 + \left\{ \frac{c_{norm} - a_{ps.cubic}}{a_{ps.cubic}} \right\}^2 \right]^{0.5} \quad (1)$$

where the parameters of  $a_{norm}$ ,  $b_{norm}$ ,  $c_{norm}$  and  $a_{ps.cubic}$  can be calculated by the following equations:

$$a_{ps.cubic} = \sqrt[3]{V} \quad (2)$$

$$a_{norm} = \frac{a}{\sqrt{2^3 \sqrt{V}}} \quad (3)$$

$$b_{norm} = \frac{b}{\sqrt{2^3 \sqrt{V}}} \quad (4)$$

$$c_{norm} = \frac{c}{\sqrt{2^3 \sqrt{V}}} \quad (5)$$

$a$ ,  $b$  and  $c$  are the lattice parameters of perovskite, and  $V$  is the lattice volume.

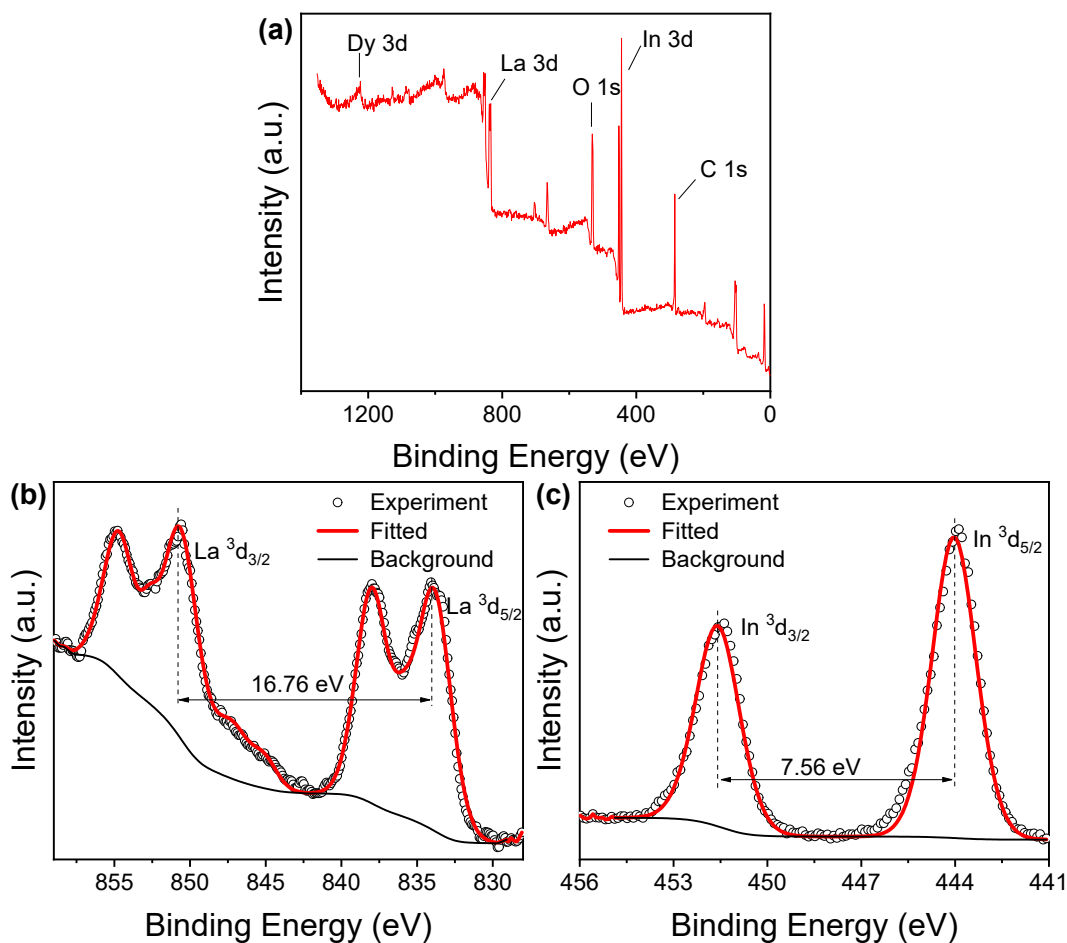

**Fig. S2 XPS spectra of the LIO: 0.09Dy<sup>3+</sup>.** (a) **Spectrum of survey scan.** It is shown that the material is composed of Dy, La, In, O and C elements, without any other exotic elements were observed. (b) **Spectrum of La 3d core level.** The measured binding energy of core level La <sup>3</sup>d<sub>5/2</sub> is 833.88 eV, and the binding energy of La <sup>3</sup>d<sub>3/2</sub> is 850.64 eV, thus the energy difference is 16.76 eV. These results indicate that the La element exists in +3 oxidation state. (c) **Spectrum of In 3d core level.** The core level In <sup>3</sup>d<sub>5/2</sub> with binding energy of 444.03 eV, as well at the core level In <sup>3</sup>d<sub>3/2</sub> at 451.59 eV, is observed, and the energy difference of them is 7.56 eV, revealing that the In element also exists in +3 oxidation state.



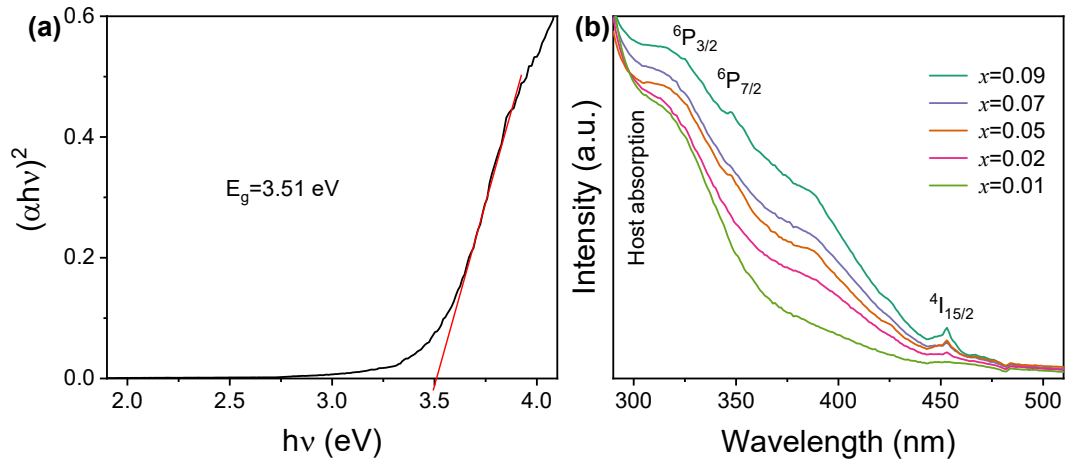

**Fig. S3 (a) The relation of  $(\alpha h\nu)^2$  vs.  $h\nu$  for LIO host.** The obtained band gap of LIO is about 3.51 eV. **(b) UV-vis absorption spectra of LIO:  $x\text{Dy}^{3+}$  in the range of 280-520 nm.** The broad absorption band from 300 to 340 nm is due to the electronic interband transition. The absorption was enhanced through increasing the  $\text{Dy}^{3+}$  doping levels.

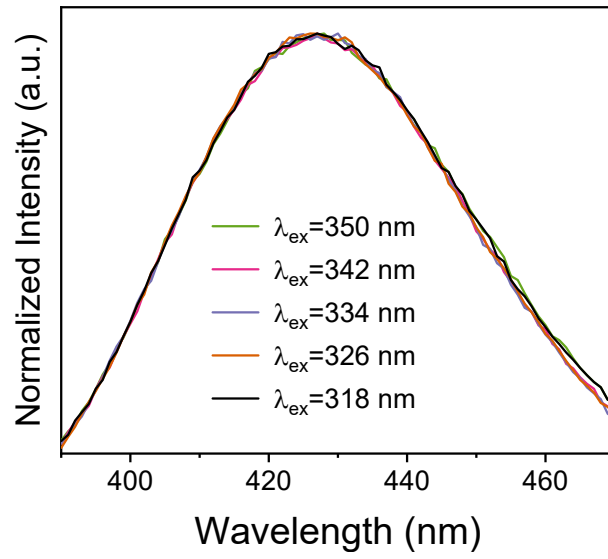

**Fig. S4 PL spectra of LIO under 318, 326, 334, 342 and 350 nm excitation.** The normalized PL spectra are almost identical, indicating that the excitation can generate the same emission.

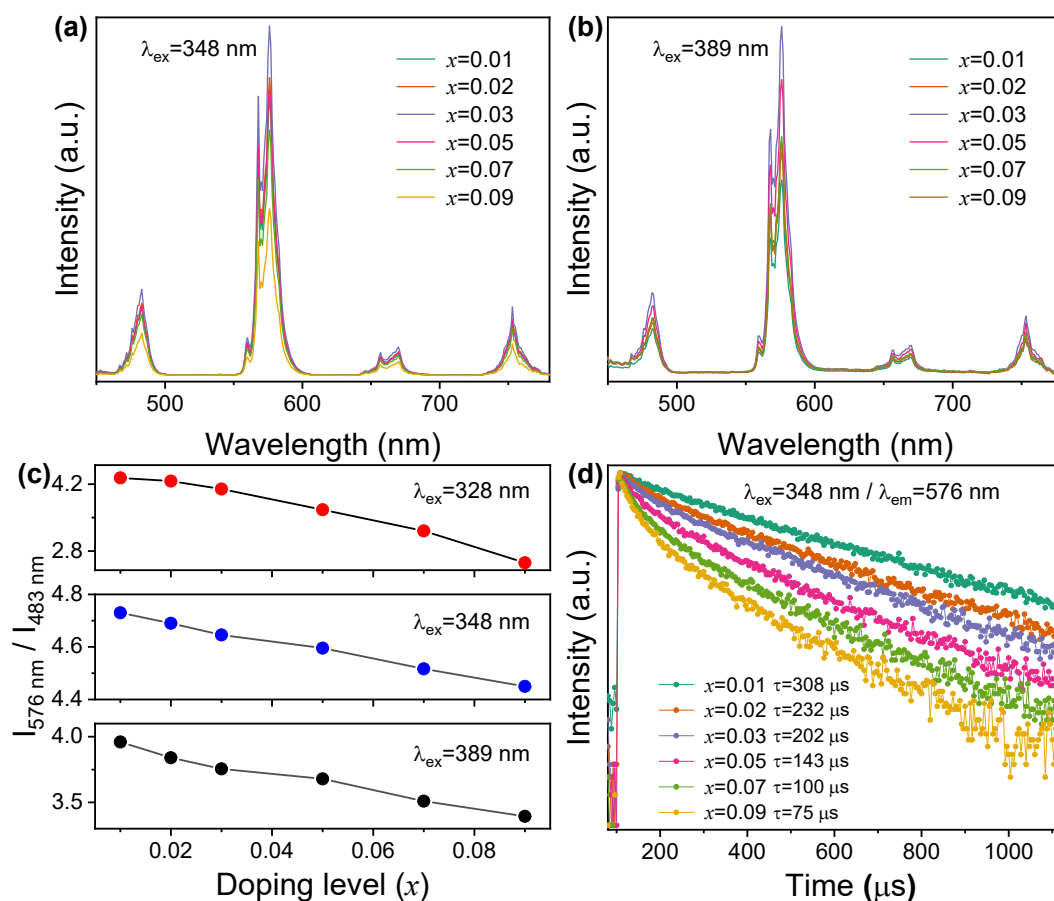

**Fig. S5** PL spectra of LIO:  $x\text{Dy}^{3+}$  excited by the lights with the wavelength of (a) 348 nm and (b) 389 nm respectively. As the doping level is increasing, the emission intensity increases firstly, and reaches the maximum as  $x=0.03$ , and then decreases due to the concentration quenching. (c) The intensity ratio ( $I_{576\text{ nm}} / I_{483\text{ nm}}$ ) of the emission from the electric dipole (ED) transition and that from the magnetic dipole (MD) transition. The emission intensity ratio decreases with increasing the  $\text{Dy}^{3+}$  doping level, indicating that the symmetry of  $\text{Dy}^{3+}$  site becomes higher. (d) Fluorescence decay curves monitored at 576 nm when the LIO:  $x\text{Dy}^{3+}$  phosphors are excited by the 348 nm light. The lifetime ( $\tau$ ) decreases from 308  $\mu\text{s}$  to 75  $\mu\text{s}$  as the  $\text{Dy}^{3+}$  doping level increases from  $x=0.01$  to  $x=0.09$ .

## REFERENCES

1. J. Hernandez-Andres, R. Lee and J. Romero, *Appl. Opt.*, 1999, **38**, 5703-5709.
2. C. S. McCamy, *Color Res. Appl.*, 1992, **17**, 142-144.
3. C. Liu, W. Zhou, R. Shi, L. Lin, R. Zhou, J. Chen, Z. Li and H. Liang, *J. Mater. Chem. C*, 2017, **5**, 9012-9020.
4. K. Li, Y. Zhang, X. Li, M. Shang, H. Lian and J. Lin, *Phys. Chem. Chem. Phys.*, 2015, **17**, 4283-4292.
5. K. Li, X. Liu, Y. Zhang, X. Li, H. Lian and J. Lin, *Inorg. Chem.*, 2015, **54**, 323-333.
6. Y. Zhang, W. Gong, J. Yu, Z. Cheng and G. Ning, *RSC Adv.*, 2016, **6**, 30886-30894.
7. Y. Yang, H. Bao, H. Ni, X. Ou, S. Wang, B. Lin, P. Feng and Y. Ling, *J. Power Sources*, 2021, **482**.
